# Supplementary material for: Individual dispersion of carbon nanotubes in epoxy via a novel dispersion–curing approach using ionic liquids
Source: Royal Society of Chemistry journal article supplement (doi:10.1039/c3cp00064h), 2013-01-01
Supplement: c3cp00064h.pdf [file c3cp00064h.pdf]

## Supplementary Information

### **Individual dispersion of carbon nanotubes in epoxy via a novel dispersion-curing approach using ionic liquids**

Nishar Hameed<sup>1\*</sup>, Nisa V. Salim<sup>1</sup>, Tracey L. Hanley<sup>2</sup>, Mrunali Sona<sup>1</sup>, Qipeng Guo<sup>1\*</sup> and Bronwyn L. Fox

<sup>1</sup>*Institute for Frontier Materials, Deakin University, Geelong, Vic, 3216, Australia*

<sup>2</sup>*Institute Materials Engineering, Australian Nuclear Science and Technology Organisation, Lucas Heights, New South Wales 2234, Australia*

**Optimization of IL amount as dispersion-curing agent.** In this study we have investigated the use of IL a curing agent for epoxy resin as well as a dispersion agent for MWCNTs. The amount of IL was a significant challenge as we have to find the right balance of these two requirements and there were no previous similar studies of epoxy curing using a combination of IL and amine curing agent. The amount of BMMIBF<sub>4</sub> was chosen based on a number of repeated sample preparation and characterisation steps. We have prepared epoxy thermosets with a wide range of BMMIBF<sub>4</sub>/4,4'-methylenedianiline (MDA) combinations as curing agent. Thermosets containing 0.1 up to 1 wt% BMIMBF<sub>4</sub> with respect to epoxy was prepared and a stoichiometric amount of MDA was used in all the cases. We have examined the glass transition and tensile mechanical properties of these thermosets. Based on these physical properties 0.5wt% IL was optimized as amount of BMMIBF<sub>4</sub> that provides a mechanically and thermally strong matrix for CNT dispersion. Moreover this study focus on the preparation of composites with low MWCNT loading (0.1 to 1wt%). The experimental results are given in Table S1.

**Differential Scanning Calorimetry.** DSC experiments were performed using 5–10 mg of the samples under an atmosphere of nitrogen gas with a TA-DSC model Q200 instrument. The samples were first heated to 100 °C and held at that temperature for 5 min to remove the thermal history. Then, the samples were cooled to -80 °C at the rate of 20 °C / min, held for 5 min, and again heated from -80 to 250 °C at 20 °C / min (second scan). The  $T_g$  values were taken as the midpoint of the transition in the second scan of the DSC thermograms.

**Thermogravimetry analysis.** Thermogravimetry analyses (TGA) were performed on Netzsch STA 409 thermogravimetric analyser over a temperature range of 25–600 °C at a heating rate of 10 °C /min. The measurement was performed using 5–10 mg of the sample under an atmosphere of nitrogen gas. The decomposition temperature ( $T_d$ ) was obtained from the onset value of the weight loss curve.

**Table S1.** The tensile mechanical and glass transition of properties of thermosets using various amounts of BMIMBF<sub>4</sub>.

| Wt% of BMMIBF <sub>4</sub><br>in epoxy | Tensile Strength<br>(MPa) | Tensile Strain<br>(%) | $T_g$ (DSC) °C |
|----------------------------------------|---------------------------|-----------------------|----------------|
| 0                                      | 50.12 ± 2                 | 4.87                  | 172            |
| 0.1                                    | 50.9 ± 2                  | 4.98                  | 173            |
| 0.2                                    | 51.32 ± 1                 | 5.10                  | 175            |
| 0.3                                    | 52.87 ± 2                 | 5.46                  | 178            |
| 0.4                                    | 54.11 ± 1                 | 5.89                  | 181            |
| 0.5                                    | 55.68 ± 2                 | 6.17                  | 183            |
| 0.6                                    | 53.11 ± 2                 | 6.16                  | 180            |
| 0.7                                    | 51.86 ± 3                 | 6.08                  | 175            |
| 0.8                                    | 49.54 ± 3                 | 5.98                  | 169            |
| 0.9                                    | 47.01 ± 2                 | 5.55                  | 163            |
| 1                                      | 43.89 ± 4                 | 5.05                  | 154            |

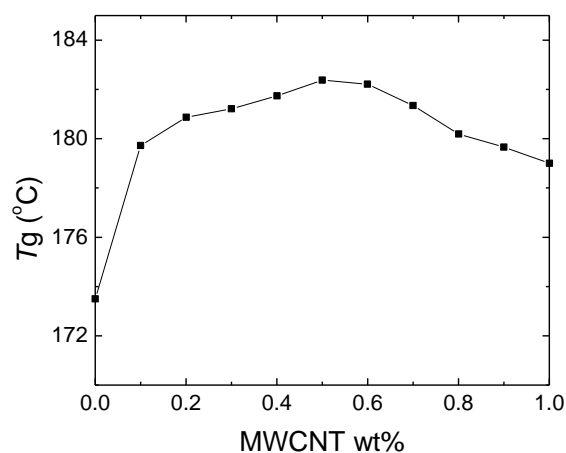

**Figure S1.** The  $T_g$ -composition plots of epoxy+BMIMBF<sub>4</sub>+MWCNT composites obtained from DSC.

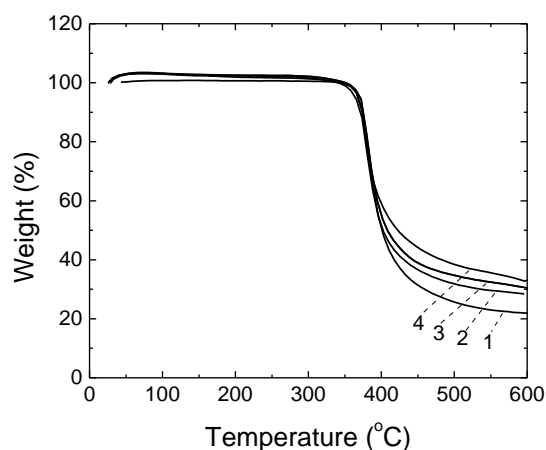

**Figure S2.** Thermogravimetric curves of composites; 1 – 0 wt%, 2 – 0.1 wt%, 3 – 0.5 wt%, 4 – 1 wt% MWCNT reinforced epoxy composites.

**Table S2.** Comparison of Epoxy/CNT composites prepared using various methods to improve the thermo-mechanical properties.

| Epoxy Composite | Method of dispersion/preparation | Maximum Gain |                     |                     |                      |                        |              |
|-----------------|----------------------------------|--------------|---------------------|---------------------|----------------------|------------------------|--------------|
|                 |                                  | $T_g$ (°C)   | Storage Modulus (%) | Young's Modulus (%) | Tensile Strength (%) | Tensile Elongation (%) | $K_{1C}$ (%) |
|                 |                                  |              |                     |                     |                      |                        |              |

|                               |                                                                                                                  |     |    |    |    |     |
|-------------------------------|------------------------------------------------------------------------------------------------------------------|-----|----|----|----|-----|
|                               | Modified                                                                                                         |     |    |    |    |     |
| Epoxy/<br>MWCNT <sup>26</sup> | polydimethylsiloxanes<br>based block<br>copolymer dispersion                                                     |     |    | 17 | -8 | -38 |
| Epoxy/<br>MWCNT <sup>27</sup> | COOH-functionalized<br>MWCNTs/<br>ultrasonication                                                                | 0   | 20 |    |    |     |
| Epoxy/<br>MWCNT <sup>28</sup> | Ozone treatment/<br>high-speed mixer/<br>three-roll mill                                                         | 2   |    | 3  | 23 | 100 |
| Epoxy/<br>MWCNT <sup>29</sup> | High intensity<br>sonication/ice bath                                                                            |     | 25 | 0  |    | 40  |
| Epoxy/<br>MWCNT <sup>30</sup> | Amine<br>functionalization of<br>MWCNT                                                                           | -20 |    |    |    |     |
| Epoxy/DW<br>CNT <sup>29</sup> | Amine<br>Functionalization/high<br>shear mixing                                                                  |     |    | 14 | 8  | 43  |
| Epoxy/MW<br>CNT <sup>31</sup> | Amine<br>Functionalization/high<br>shear mixing                                                                  |     |    | 9  | <1 | 30  |
| Epoxy/<br>MWCNT <sup>32</sup> | Acetone dispersion/<br>ultrasonication/ high<br>pressure homogenizer/<br>high shear mixer/<br>three-roll milling |     |    |    |    | 80  |

|                                                 |                                                                                           |          |           |           |           |           |
|-------------------------------------------------|-------------------------------------------------------------------------------------------|----------|-----------|-----------|-----------|-----------|
| Epoxy/SW<br>CNT <sup>33</sup>                   | Functionalized with<br>polyamidoamine<br>generation-0<br>dendrimer/ Acetone<br>dispersion |          | 26        | 15        | 2         | 17        |
| Epoxy/MW<br>CNT <sup>34</sup>                   | Acetone/Non-ionic<br>surfactant (Tergitol)<br>dispersion                                  | - 4      |           |           |           |           |
| <b>Epoxy/MW<br/>CNT<br/>(present<br/>study)</b> | <b>IL/sonication</b>                                                                      | <b>9</b> | <b>48</b> | <b>13</b> | <b>23</b> | <b>36</b> |
|                                                 |                                                                                           |          |           |           | <b>95</b> |           |
